# Supplementary material
Source: publisher figshare collection journal article supplement (https://tandf.figshare.com/ndownloader/files/33288026)
Supplement: Supplementary file 1 [file 33288026]

## Sheet: Sheet1
Table S2: Manufacturer, model/SKU, and/or ASIN used of each blue blocker.
Manufacturer	Blue Blocker	Title	Model Number/SKU	ASIN
Livho	BLBG 1	Anti UV Computer Gaming Glasses	-	B07N2LY4PH
J+S	BLBG 2	Blue Light Shield Computer/Gaming Glasses	EC0087-parent-SNCN_V	B095XSKPCH
Payne	BLBG 3	Windsor	14210K07	4210K07
Annri	BLBG 4	Filter Blue Ray Computer Game Glasses	AR0103	B07FZCBYGC
EyeBuyDirect	BLBG 5	Robbie	36990513-1/1
Blue Shark Optics	BLBG 6	Classic Aspis	SKU: CLBBR9360
Prospek	BLBG 7	Gaming Glasses Blue Light Blocking with Clear Lens	S117	B00RJ3OYWG
Nectar	BLBG 8	Cobalt	-	-
Cyxus	BLBG 9	UV Blocking Eyeglasses	-	B08ZSLZM5C
Foster Grant	BLBG 10	e.Glasses	5010243-000.COM	-
Tuncer	BLBG 11	Blue Light Blocking Glasses Anti Eyestrain	-	B081NW4B5J
Meetsun	BLBG 12	Blue Light Blocking Glasses, Anti Eye Strain Headache (Sleep Better),Computer Glasses	BD14057	BD14057
Teddith	BLBG 13	Tango	-	-
Blue Shark Optics	BLBG 14	Blue Aspis	-	-
Blue Shark Optics	BLBG 15	Pinnacle Aspis	SKU: PBR09	-
Eye Love	BLBG 16	Computer and Gaming	-	B0755GW72V
Gejoy	BLBG 17	Yellow		B07MNRNK6H
Truedark	BLBG 18	Daylights Elite	-	-
Feisedy	BLBG 19	Retro	-	B079L1KYF3
The Fresh	BLBG 20	Aviator	FR10046	B0756DD5WH
Coasion	BLBG 21	Retro	-	B07S4GXSKS
Gejoy	BLBG 22	Pink	-	B07MNRNK6H
Sungait	BLBG 23	Aviator	-	B073WSSTF1
Felix Gray	BLBG 24	Hamilton	c23 49-21-140	B0876FP784
TIJN	BLBG 25	Gaming Glasses	110601	B07ST9G1MF
Manta Sleep	BLBG 26	Blue Light Blocking Glasses	-	-
Gunnar	BLBG 27	Intercept	INT-00101-N-A
Gamma Ray	BLBG 28	Blue Light Blocking Glasses	-	B08LDJ4NGD
Gejoy	BLBG 29	Brown	-	B07MNRNK6H
HexArmour	BLBG 30	MX300	11-13005-02	-
Cocoons	BLBG 31	MX Sand Polarized Amber	C705A	-
Cocoons	BLBG 32	ML Black Hazelnut UV Filters	C422H	-
Sungait	BLBG 33	Ultra	-	B01M0D52OK
Zendustries, Inc.	BLBG 34	Blue Blocking Amber Glasses for Sleep	4332484260	B01GSFTX08
sleep zm	BLBG 35	eSports Gaming	‎IG-TYTX-QL4P	‎B086WQ1CL8
Swanwick	BLBG 36	Classic Night Swannies 2019	SW101-TR	-
Luminere	BLBG 37	Sleep Doctor	-	-
Dream Elements	BLBG 38	Anti Blue-Light	-	B076HRTF1P
Swanwick	BLBG 39	Classic Night Swannies 2020	SW101-BR
Gejoy	BLBG 40	Orange	-	B07MNRNK6H
Glofx	BLBG 41	Orange Mood Light Therapy	-	B073PLRWYX
Element Lux	BLBG 42	Gaming Glasses and Computer Glasses	-	B07ZG3P352
Amazon Basics	BLBG 43	Blue Light Blocking Safety Glasses	V2003count	B07K3FTJJH
Uvex	BLBG 44	Skyper	‎S1933X	B000USRG90
Hack Your Sleep	BLBG 45	NoBlue	NoBlue1	B019DMZZUU
GloFx	BLBG 46	Red Mood Light Therapy	-	B073PM1JF1
Infield Safety	BLBG 47	Terminator	‎9380 420	B005IPPBNI
Safetyblue	BLBG 48	Deep Red Light Therapy Glasses	-	B085VMDK7H
Sundown Eyewear	BLBG 49	PaleoTech Dark Therapy Lens	-	B07H44C8DT
Truedark	BLBG 50	Twilights Classic	-	-
